# Supplementary material for: A Straightforward Method to Prepare MOF-Based Membranes via Direct Seeding of MOF-Polymer Hybrid Nanoparticles
Source: MDPI journal article supplement (doi:10.3390/membranes13010065), 2023-01-04
Supplement: s1 [file s1]

Supplementary Materials

# A Straightforward Method to Prepare MOF-Based Membranes Via Direct Seeding of MOF-Polymer Hybrid Nanoparticles

Mingyuan Fang <sup>1</sup>, Martin Drobek <sup>1</sup>, Didier Cot <sup>1</sup>, Carmen Montoro <sup>2,\*</sup> and Mona Semsarilar <sup>1,\*</sup>

<sup>1</sup> Institut Européen des Membranes, IEM UMR 5635, University of Montpellier, CNRS, ENSCM, 34095 Montpellier, France

<sup>2</sup> Inorganic Chemistry Department, Universidad Autónoma de Madrid, 28049 Madrid, Spain

\* Correspondence: carmen.montoro@uam.es (C.M.); mona.semsarilar@umontpellier.fr (M.S.)

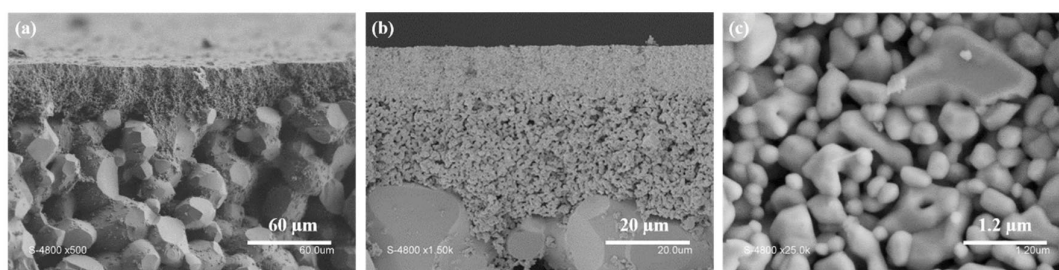

**Figure S1.** SEM images for (a,b) cross-section and (c) top view of  $\alpha$ -alumina tubular membrane supports.

**Table S1.** Experimental parameters for the synthesis of UiO-PMAA-*b*-PMMA NPs and UiO-NH<sub>2</sub>-PMAA-*b*-PMMA NPs.

| NPs                                       | ZrCl <sub>4</sub><br>(mmol) | Organic Linker<br>(mmol) | PMAA- <i>b</i> -PMMA<br>(mmol) <sup>a</sup> | PMAA- <i>b</i> -PMMA<br>20 wt% in EtOH (mg) <sup>b</sup> |
|-------------------------------------------|-----------------------------|--------------------------|---------------------------------------------|----------------------------------------------------------|
| UiO-PMAA- <i>b</i> -PMMA                  | 0.5                         | 0.5                      | $3.2 \times 10^{-3}$                        | 290                                                      |
| UiO-NH <sub>2</sub> -PMAA- <i>b</i> -PMMA | 0.5                         | 0.5                      | $3.2 \times 10^{-3}$                        | 290                                                      |

<sup>a</sup> One polymer chain of PMAA-*b*-PMMA containing 64 units of carboxylic functions. <sup>b</sup> Average molecular weight of PMAA-*b*-PMMA is calculated from PMAA<sub>64</sub>-*b*-PMMA<sub>124</sub>.

## Characterization results for UiO-NH<sub>2</sub>-PMAA-*b*-PMMA NPs

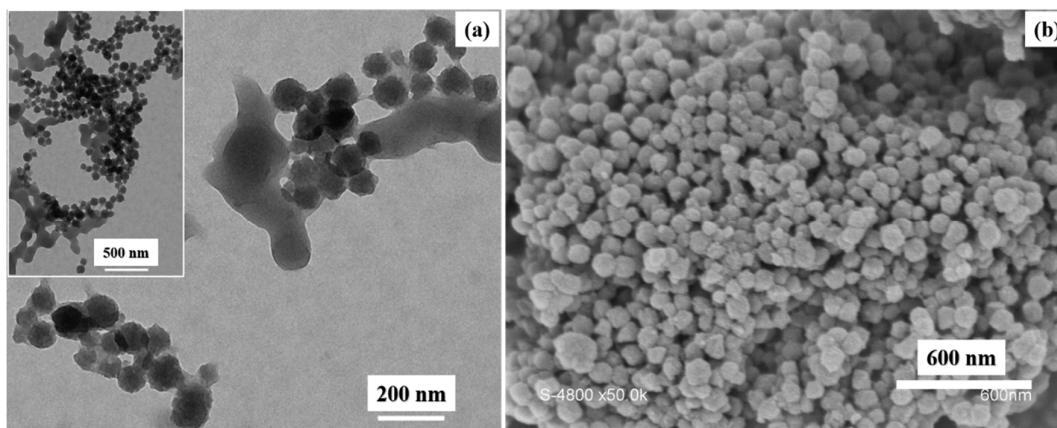

**Figure S2.** (a) TEM and (b) SEM images of UiO-NH<sub>2</sub>-PMAA-*b*-PMMA NPs.

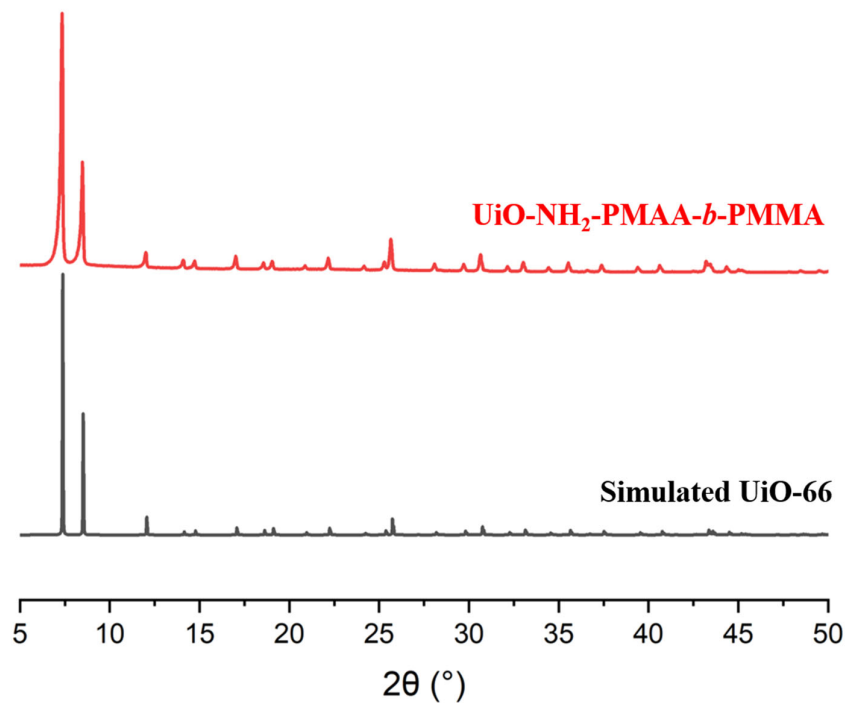

**Figure S3.** XRD patterns of UiO-NH<sub>2</sub>-PMAA-*b*-PMMA powder (red) and simulated UiO-66 patterns (black) [1].

Powder XRD (Figure S3) of UiO-NH<sub>2</sub>-PMAA-*b*-PMMA pattern show first two main peaks at 7.40° and 8.55° (2θ) characterizing the formation of UiO-66 structure. The diffraction peaks are sharp and intense indicating that the presence of PMAA-*b*-PMMA NPs does not affect the crystalline phase growth of the UiO-66-NH<sub>2</sub>.

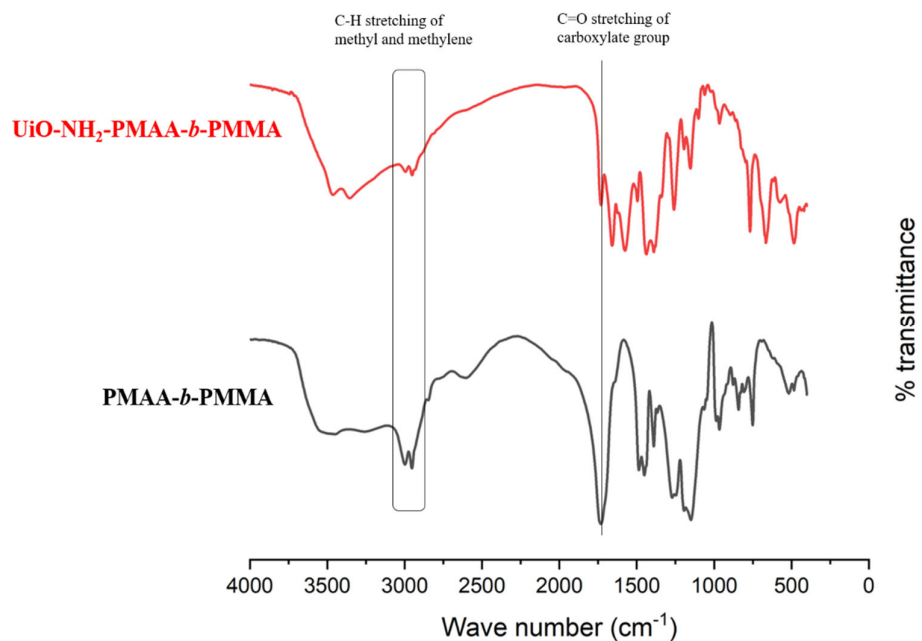

**Figure S4.** FT-IR spectrum for UiO-NH<sub>2</sub>-PMAA-*b*-PMMA powder (red) and PMAA-*b*-PMMA (black).

The UiO-NH<sub>2</sub>-PMAA-*b*-PMMA powder was further analyzed by FT-IR measurements (Figure S4). The broad and intense band between 3500 and 3300 cm<sup>-1</sup> is related to the presence of N-H stretching of the amine group. C-H stretching of methyl and methylene groups between 2995 and 2955 cm<sup>-1</sup> and an intense C=O stretching band of carboxylate group at 1730 cm<sup>-1</sup> can be found. These signals prove that the PMAA-*b*-PMMA NPs were incorporated in UiO-NH<sub>2</sub>-PMAA-*b*-PMMA samples.

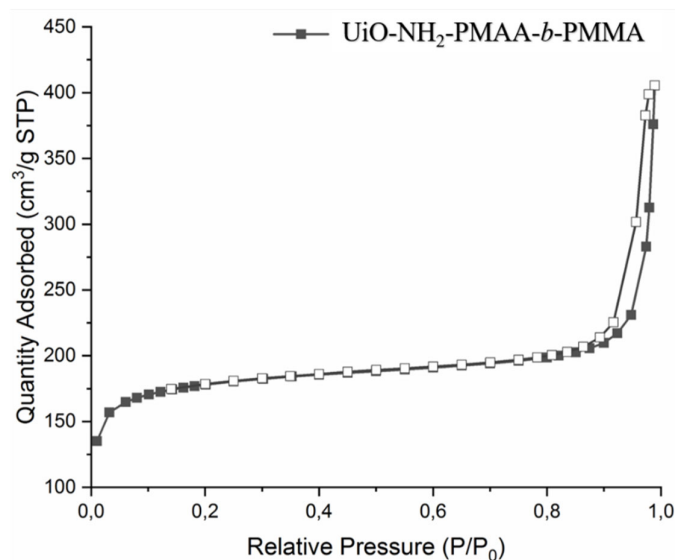

**Figure S5.** N<sub>2</sub> adsorption isotherms measured at 77 K for UiO-NH<sub>2</sub>-PMAA-*b*-PMMA powder. Filled and empty symbols represent adsorption and desorption, respectively.

Nitrogen adsorption isotherms (Figure S5) of the UiO-NH<sub>2</sub>-PMAA-*b*-PMMA powder, exhibited a mixture of type I and IV isotherm at 77 K with a Brunauer–Emmett–Teller (BET) surface area of 605 m<sup>2</sup> g<sup>-1</sup> indicating the existence of microporous and mesoporous structure of UiO-NH<sub>2</sub>-PMAA-*b*-PMMA NPs. This also corroborated that the presence of the polymer NPs did not affect the pore accessibility of the UiO-NH<sub>2</sub>-PMAA-*b*-PMMA structure.

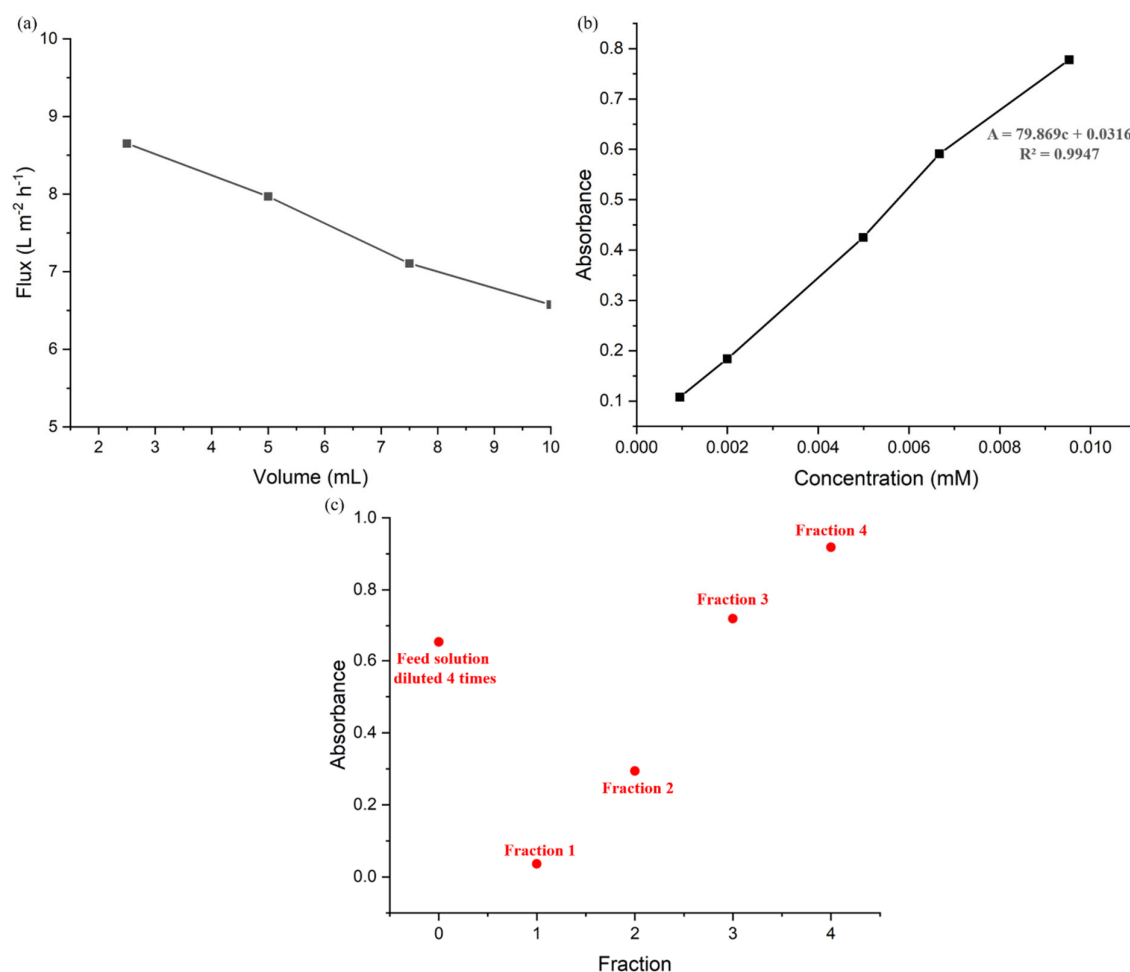

**Figure S6.** (a) Filtration flux of RhB solution versus filtration volume through UiO-66-NH<sub>2</sub> secondary growth membrane, (b) calibration line of UV absorbance at 554 nm versus RhB concentration, (c) UV absorbance of different fractions.

## Reference

1. Øien, S.; Wragg, D.; Reinsch, H.; Svelle, S.; Bordiga, S.; Lamberti, C.; Lillerud, K.P. Detailed structure analysis of atomic positions and defects in zirconium metal-organic frameworks. *Cryst. Growth Des.* **2014**, *14*, 5370–5372, doi:10.1021/cg501386j.

**Disclaimer/Publisher's Note:** The statements, opinions and data contained in all publications are solely those of the individual author(s) and contributor(s) and not of MDPI and/or the editor(s). MDPI and/or the editor(s) disclaim responsibility for any injury to people or property resulting from any ideas, methods, instructions or products referred to in the content.
